# Supplementary material for: Exploration of Interethnic Variation in the Ibuprofen Metabolizing Enzyme&nbsp;CYP2C9: A Cautionary Guide for Treatment of COVID-19 Symptoms
Source: Research Square preprint supplement (doi:10.21203/rs.3.rs-156293/v1), 2021-02-08
Supplement: Supplementary file 2 [file 4e0c30d43d15a87734a312df.xlsx]

## Sheet: Additional File 8
Additional File 8. Prevalences of CYP2C9 alleles *2 and *3 phenotypes(a) in biogeographical groupsa and Jordanian, strongly associated with Level 1A PharmGKB.
Diplotype b,c	Jordanian**	African American/ Afro-Caribbean	American	Central/South Asian	East Asian	European	Latino	Near Eastern	Oceanian	Sub-Saharan African	Coded Genotype/ Phenotype Summary a	EHR Priority Result Notationb
*1/*2	0.158	0.0391	0.0609	0.176	0.00389	0.202	0.132	0.203	0.056	0.019	CYP2C9 Intermediate Metabolizer	Abnormal/Priority/High Risk
*1/*3	0.139	0.0235	0.0548	0.17	0.0689	0.12	0.0694	0.129	0.0298	0.0162	CYP2C9 Intermediate Metabolizer	Abnormal/Priority/High Risk
*2/*11		0.000622	0.000187	0.000237	1.25e-06	0.000419	0.000443	0		0.000674	CYP2C9 Intermediate Metabolizer	Abnormal/Priority/High Risk
*2/*12		0		0	1.78e-06			0.00026		0	CYP2C9 Intermediate Metabolizer	Abnormal/Priority/High Risk
*2/*14					1.43e-06			0.00026			CYP2C9 Intermediate Metabolizer	Abnormal/Priority/High Risk
*2/*16					7.98e-06						CYP2C9 Intermediate Metabolizer	Abnormal/Priority/High Risk
*2/*2	0	0.000503	0.00112	0.0129	4.52e-06	0.0162	0.00582	0.0168	0.000859	0.000172	CYP2C9 Intermediate Metabolizer	Abnormal/Priority/High Risk
*2/*23					9.01e-07						CYP2C9 Intermediate Metabolizer	Abnormal/Priority/High Risk
*2/*26					8.5e-06						CYP2C9 Intermediate Metabolizer	Abnormal/Priority/High Risk
*2/*28					8.5e-06						CYP2C9 Intermediate Metabolizer	Abnormal/Priority/High Risk
*2/*29					9.39e-06						CYP2C9 Intermediate Metabolizer	Abnormal/Priority/High Risk
*2/*30					6.63e-06						CYP2C9 Intermediate Metabolizer	Abnormal/Priority/High Risk
*2/*31					6.81e-06						CYP2C9 Intermediate Metabolizer	Abnormal/Priority/High Risk
*2/*4		0	0	0	0	0	0	0.000305		0	CYP2C9 Intermediate Metabolizer	Abnormal/Priority/High Risk
*2/*5		0.000522	9.96e-05	0	0	4.44e-05	0.00133	0.000136		0.000271	CYP2C9 Intermediate Metabolizer	Abnormal/Priority/High Risk
*2/*55					4.42e-05						CYP2C9 Intermediate Metabolizer	Abnormal/Priority/High Risk
*2/*8		0.00265	0.00136	0.000223	1.59e-05	0.00046	0.00112	0.000167		0.00199	CYP2C9 Intermediate Metabolizer	Abnormal/Priority/High Risk
*2/*9		0		0	0			0		0.0034	CYP2C9 Intermediate Metabolizer	Abnormal/Priority/High Risk
*3/*9		0		0	0			0		0.00289	CYP2C9 Intermediate Metabolizer	Abnormal/Priority/High Risk
*2/*13		0			1.41e-05			0			CYP2C9 Poor Metabolizer	Abnormal/Priority/High Risk
*2/*25		0			8.5e-06						CYP2C9 Poor Metabolizer	Abnormal/Priority/High Risk
*2/*3	0.03	0.000606	0.00201	0.025	0.00016	0.0192	0.00612	0.0214	0.000913	0.000293	CYP2C9 Poor Metabolizer	Abnormal/Priority/High Risk
*2/*33					2.77e-06			0.00026			CYP2C9 Poor Metabolizer	Abnormal/Priority/High Risk
*2/*42					4.25e-05			0.00026			CYP2C9 Poor Metabolizer	Abnormal/Priority/High Risk
*2/*6		0.000382	0	0	0	7.14e-05	0.000149	0		0.000231	CYP2C9 Poor Metabolizer	Abnormal/Priority/High Risk
*3/*11		0.000374	0.000169	0.000229	2.21e-05	0.000248	0.000233	0		0.000573	CYP2C9 Poor Metabolizer	Abnormal/Priority/High Risk
*3/*12		0		0	3.15e-05			0.000165		0	CYP2C9 Poor Metabolizer	Abnormal/Priority/High Risk
*3/*13		0			0.00025			0			CYP2C9 Poor Metabolizer	Abnormal/Priority/High Risk
*3/*14					2.53e-05			0.000165			CYP2C9 Poor Metabolizer	Abnormal/Priority/High Risk
*3/*16					0.000141						CYP2C9 Poor Metabolizer	Abnormal/Priority/High Risk
*3/*23					1.59e-05						CYP2C9 Poor Metabolizer	Abnormal/Priority/High Risk
*3/*25		0			0.00015						CYP2C9 Poor Metabolizer	Abnormal/Priority/High Risk
*3/*26					0.00015						CYP2C9 Poor Metabolizer	Abnormal/Priority/High Risk
*3/*28					0.00015						CYP2C9 Poor Metabolizer	Abnormal/Priority/High Risk
*3/*29					0.000166						CYP2C9 Poor Metabolizer	Abnormal/Priority/High Risk
*3/*3	0	0.000182	0.000903	0.0121	0.00142	0.00571	0.00161	0.00681	0.000243	0.000124	CYP2C9 Poor Metabolizer	Abnormal/Priority/High Risk
*3/*30					0.000117						CYP2C9 Poor Metabolizer	Abnormal/Priority/High Risk
*3/*31					0.000121						CYP2C9 Poor Metabolizer	Abnormal/Priority/High Risk
*3/*33					4.91e-05			0.000165			CYP2C9 Poor Metabolizer	Abnormal/Priority/High Risk
*3/*4		0	0	0	0	0	0	0.000194		0	CYP2C9 Poor Metabolizer	Abnormal/Priority/High Risk
*3/*42					0.000752			0.000165			CYP2C9 Poor Metabolizer	Abnormal/Priority/High Risk
*3/*5		0.000314	8.96e-05	0	0	2.64e-05	0.0007	8.63e-05		0.00023	CYP2C9 Poor Metabolizer	Abnormal/Priority/High Risk
*3/*55					0.000782						CYP2C9 Poor Metabolizer	Abnormal/Priority/High Risk
*3/*6		0.00023	0	0	0	4.23e-05	7.83e-05	0		0.000196	CYP2C9 Poor Metabolizer	Abnormal/Priority/High Risk
*3/*8		0.00159	0.00123	0.000216	0.000281	0.000273	0.000592	0.000106		0.00169	CYP2C9 Poor Metabolizer	Abnormal/Priority/High Risk
Total of Abnormal/Priority/ High Risk EHR Priority Result	0.327	0.070575	0.122868	0.396905	0.07776	0.364695	0.219595	0.379704	0.087815	0.047934
*2/*19					2.03e-06						Indeterminate	none
*2/*27		0			6.88e-06						Indeterminate	none
*2/*34					9.01e-07						Indeterminate	none
*3/*19					3.59e-05						Indeterminate	none
*3/*27		0			0.000122						Indeterminate	none
*3/*34	0				1.59e-05						Indeterminate	none
Total of None EHR Priority Result	0	0	0	0	0.000184	0	0	0	0	0
aAverage frequencies based on the reported frequencies in one or multiple studies.
bBased on the PharmGKB biogeographical groups https://www.pharmgkb.org/page/biogeographicalGroups
cSee allele definition table (https://www.pharmgkb.org/page/cyp2c9RefMaterials) for allele definitions
**Current study
Ammar Ali Almarzooq
Galore Consultancy
ammar@galoreconsultancy.com
