# Supplementary material for: Exploration of Interethnic Variation in the Ibuprofen Metabolizing Enzyme&nbsp;CYP2C9: A Cautionary Guide for Treatment of COVID-19 Symptoms
Source: Research Square preprint supplement (doi:10.21203/rs.3.rs-156293/v1), 2021-02-08
Supplement: Supplementary file 8 [file e4e659934a4cdd19dbcaec34.xlsx]

## Sheet: Additional File 10
Additional File 10. Prevalences of CYP2C9 phenotypes in biogeographical groupsa and Jordanian.
Diplotypeb, c	Jordanian**	African American/ Afro-Caribbean	American	Central / South Asian	East Asian	European	Latino	Near Eastern	Oceanian	Sub-Saharan African	Coded Genotype/Phenotype Summary a	EHR Priority Result Notationb
*1/*11		0.0241	0.00511	0.00162	0.000537	0.00261	0.00501	0		0.0373	CYP2C9 Intermediate Metabolizer	Abnormal/Priority/High Risk
*1/*12		0		0	0.000765			0.00156		0	CYP2C9 Intermediate Metabolizer	Abnormal/Priority/High Risk
*1/*13		0			0.00607			0			CYP2C9 Intermediate Metabolizer	Abnormal/Priority/High Risk
*1/*14					0.000615			0.00156			CYP2C9 Intermediate Metabolizer	Abnormal/Priority/High Risk
*1/*16					0.00344						CYP2C9 Intermediate Metabolizer	Abnormal/Priority/High Risk
*1/*2	0.158	0.0391	0.0609	0.176	0.00389	0.202	0.132	0.203	0.056	0.019	CYP2C9 Intermediate Metabolizer	Abnormal/Priority/High Risk
*1/*23					0.000388						CYP2C9 Intermediate Metabolizer	Abnormal/Priority/High Risk
*1/*25		0			0.00366						CYP2C9 Intermediate Metabolizer	Abnormal/Priority/High Risk
*1/*3	0.139	0.0235	0.0548	0.17	0.0689	0.12	0.0694	0.129	0.0298	0.0162	CYP2C9 Intermediate Metabolizer	Abnormal/Priority/High Risk
*1/*30					0.00286						CYP2C9 Intermediate Metabolizer	Abnormal/Priority/High Risk
*1/*31					0.00293						CYP2C9 Intermediate Metabolizer	Abnormal/Priority/High Risk
*1/*33					0.00119			0.00156			CYP2C9 Intermediate Metabolizer	Abnormal/Priority/High Risk
*1/*4		0	0	0	0	0	0	0.00184		0	CYP2C9 Intermediate Metabolizer	Abnormal/Priority/High Risk
*1/*42					0.0183			0.00156			CYP2C9 Intermediate Metabolizer	Abnormal/Priority/High Risk
*1/*5		0.0203	0.00272	0	0	0.000277	0.0151	0.000817		0.015	CYP2C9 Intermediate Metabolizer	Abnormal/Priority/High Risk
*1/*55					0.019						CYP2C9 Intermediate Metabolizer	Abnormal/Priority/High Risk
*1/*6		0.0148	0	0	0	0.000445	0.00168	0		0.0128	CYP2C9 Intermediate Metabolizer	Abnormal/Priority/High Risk
*1/*8		0.103	0.0372	0.00152	0.00683	0.00286	0.0127	0.001		0.11	CYP2C9 Intermediate Metabolizer	Abnormal/Priority/High Risk
*11/*11		0.000192	7.86e-06	1.09e-06	8.59e-08	2.7e-06	8.42e-06	0		0.00066	CYP2C9 Intermediate Metabolizer	Abnormal/Priority/High Risk
*11/*12		0		0	2.45e-07			0		0	CYP2C9 Intermediate Metabolizer	Abnormal/Priority/High Risk
*11/*14					1.97e-07			0			CYP2C9 Intermediate Metabolizer	Abnormal/Priority/High Risk
*11/*16					1.1e-06			0			CYP2C9 Intermediate Metabolizer	Abnormal/Priority/High Risk
*11/*23					1.24e-07			0			CYP2C9 Intermediate Metabolizer	Abnormal/Priority/High Risk
*11/*26					1.17e-06			0			CYP2C9 Intermediate Metabolizer	Abnormal/Priority/High Risk
*11/*28					1.17e-06			0			CYP2C9 Intermediate Metabolizer	Abnormal/Priority/High Risk
*11/*29					1.29e-06			0			CYP2C9 Intermediate Metabolizer	Abnormal/Priority/High Risk
*11/*30					9.15e-07			0			CYP2C9 Intermediate Metabolizer	Abnormal/Priority/High Risk
*11/*31					9.4e-07			0			CYP2C9 Intermediate Metabolizer	Abnormal/Priority/High Risk
*11/*55					6.1e-06			0			CYP2C9 Intermediate Metabolizer	Abnormal/Priority/High Risk
*12/*12		0		0	1.75e-07			1e-06		0	CYP2C9 Intermediate Metabolizer	Abnormal/Priority/High Risk
*12/*14		0		0	2.81e-07			2e-06		0	CYP2C9 Intermediate Metabolizer	Abnormal/Priority/High Risk
*12/*16		0		0	1.57e-06					0	CYP2C9 Intermediate Metabolizer	Abnormal/Priority/High Risk
*12/*23		0		0	1.77e-07					0	CYP2C9 Intermediate Metabolizer	Abnormal/Priority/High Risk
*12/*26		0		0	1.67e-06					0	CYP2C9 Intermediate Metabolizer	Abnormal/Priority/High Risk
*12/*28		0		0	1.67e-06					0	CYP2C9 Intermediate Metabolizer	Abnormal/Priority/High Risk
*12/*29		0		0	1.85e-06					0	CYP2C9 Intermediate Metabolizer	Abnormal/Priority/High Risk
*12/*30		0		0	1.3e-06					0	CYP2C9 Intermediate Metabolizer	Abnormal/Priority/High Risk
*12/*31		0		0	1.34e-06					0	CYP2C9 Intermediate Metabolizer	Abnormal/Priority/High Risk
*12/*55		0		0	8.7e-06					0	CYP2C9 Intermediate Metabolizer	Abnormal/Priority/High Risk
*14/*14					1.13e-07			1e-06			CYP2C9 Intermediate Metabolizer	Abnormal/Priority/High Risk
*14/*16					1.26e-06						CYP2C9 Intermediate Metabolizer	Abnormal/Priority/High Risk
*14/*23					1.42e-07						CYP2C9 Intermediate Metabolizer	Abnormal/Priority/High Risk
*14/*26					1.34e-06						CYP2C9 Intermediate Metabolizer	Abnormal/Priority/High Risk
*14/*28					1.34e-06						CYP2C9 Intermediate Metabolizer	Abnormal/Priority/High Risk
*14/*29					1.48e-06						CYP2C9 Intermediate Metabolizer	Abnormal/Priority/High Risk
*14/*30					1.05e-06						CYP2C9 Intermediate Metabolizer	Abnormal/Priority/High Risk
*14/*31					1.08e-06						CYP2C9 Intermediate Metabolizer	Abnormal/Priority/High Risk
*14/*55					6.99e-06						CYP2C9 Intermediate Metabolizer	Abnormal/Priority/High Risk
*16/*16					3.53e-06						CYP2C9 Intermediate Metabolizer	Abnormal/Priority/High Risk
*16/*23					7.96e-07						CYP2C9 Intermediate Metabolizer	Abnormal/Priority/High Risk
*16/*26					7.51e-06						CYP2C9 Intermediate Metabolizer	Abnormal/Priority/High Risk
*16/*28					7.51e-06						CYP2C9 Intermediate Metabolizer	Abnormal/Priority/High Risk
*16/*29					8.29e-06						CYP2C9 Intermediate Metabolizer	Abnormal/Priority/High Risk
*16/*30					5.86e-06						CYP2C9 Intermediate Metabolizer	Abnormal/Priority/High Risk
*16/*31					6.02e-06						CYP2C9 Intermediate Metabolizer	Abnormal/Priority/High Risk
*16/*55					3.91e-05						CYP2C9 Intermediate Metabolizer	Abnormal/Priority/High Risk
*2/*11		0.000622	0.000187	0.000237	1.25e-06	0.000419	0.000443	0		0.000674	CYP2C9 Intermediate Metabolizer	Abnormal/Priority/High Risk
*2/*12		0		0	1.78e-06			0.00026		0	CYP2C9 Intermediate Metabolizer	Abnormal/Priority/High Risk
*2/*14					1.43e-06			0.00026			CYP2C9 Intermediate Metabolizer	Abnormal/Priority/High Risk
*2/*16					7.98e-06						CYP2C9 Intermediate Metabolizer	Abnormal/Priority/High Risk
*2/*2	0	0.000503	0.00112	0.0129	4.52e-06	0.0162	0.00582	0.0168	0.000859	0.000172	CYP2C9 Intermediate Metabolizer	Abnormal/Priority/High Risk
*2/*23					9.01e-07						CYP2C9 Intermediate Metabolizer	Abnormal/Priority/High Risk
*2/*26					8.5e-06						CYP2C9 Intermediate Metabolizer	Abnormal/Priority/High Risk
*2/*28					8.5e-06						CYP2C9 Intermediate Metabolizer	Abnormal/Priority/High Risk
*2/*29					9.39e-06						CYP2C9 Intermediate Metabolizer	Abnormal/Priority/High Risk
*2/*30					6.63e-06						CYP2C9 Intermediate Metabolizer	Abnormal/Priority/High Risk
*2/*31					6.81e-06						CYP2C9 Intermediate Metabolizer	Abnormal/Priority/High Risk
*2/*4		0	0	0	0	0	0	0.000305		0	CYP2C9 Intermediate Metabolizer	Abnormal/Priority/High Risk
*2/*5		0.000522	9.96e-05	0	0	4.44e-05	0.00133	0.000136		0.000271	CYP2C9 Intermediate Metabolizer	Abnormal/Priority/High Risk
*2/*55					4.42e-05						CYP2C9 Intermediate Metabolizer	Abnormal/Priority/High Risk
*2/*8		0.00265	0.00136	0.000223	1.59e-05	0.00046	0.00112	0.000167		0.00199	CYP2C9 Intermediate Metabolizer	Abnormal/Priority/High Risk
*2/*9		0		0	0			0		0.0034	CYP2C9 Intermediate Metabolizer	Abnormal/Priority/High Risk
*23/*23					4.49e-08						CYP2C9 Intermediate Metabolizer	Abnormal/Priority/High Risk
*23/*26					8.48e-07						CYP2C9 Intermediate Metabolizer	Abnormal/Priority/High Risk
*23/*28					8.48e-07						CYP2C9 Intermediate Metabolizer	Abnormal/Priority/High Risk
*23/*29					9.36e-07						CYP2C9 Intermediate Metabolizer	Abnormal/Priority/High Risk
*23/*30					6.61e-07						CYP2C9 Intermediate Metabolizer	Abnormal/Priority/High Risk
*23/*31					6.79e-07						CYP2C9 Intermediate Metabolizer	Abnormal/Priority/High Risk
*23/*55					4.41e-06						CYP2C9 Intermediate Metabolizer	Abnormal/Priority/High Risk
*26/*26					4e-06						CYP2C9 Intermediate Metabolizer	Abnormal/Priority/High Risk
*26/*28					8e-06						CYP2C9 Intermediate Metabolizer	Abnormal/Priority/High Risk
*26/*29					8.83e-06						CYP2C9 Intermediate Metabolizer	Abnormal/Priority/High Risk
*26/*30					6.24e-06						CYP2C9 Intermediate Metabolizer	Abnormal/Priority/High Risk
*26/*31					6.41e-06						CYP2C9 Intermediate Metabolizer	Abnormal/Priority/High Risk
*26/*55					4.16e-05						CYP2C9 Intermediate Metabolizer	Abnormal/Priority/High Risk
*28/*28					4e-06						CYP2C9 Intermediate Metabolizer	Abnormal/Priority/High Risk
*28/*29					8.83e-06						CYP2C9 Intermediate Metabolizer	Abnormal/Priority/High Risk
*28/*30					6.24e-06						CYP2C9 Intermediate Metabolizer	Abnormal/Priority/High Risk
*28/*31					6.41e-06						CYP2C9 Intermediate Metabolizer	Abnormal/Priority/High Risk
*28/*55					4.16e-05						CYP2C9 Intermediate Metabolizer	Abnormal/Priority/High Risk
*29/*29					4.88e-06						CYP2C9 Intermediate Metabolizer	Abnormal/Priority/High Risk
*29/*30					6.89e-06						CYP2C9 Intermediate Metabolizer	Abnormal/Priority/High Risk
*29/*31					7.08e-06						CYP2C9 Intermediate Metabolizer	Abnormal/Priority/High Risk
*29/*55					4.59e-05						CYP2C9 Intermediate Metabolizer	Abnormal/Priority/High Risk
*3/*9		0		0	0			0		0.00289	CYP2C9 Intermediate Metabolizer	Abnormal/Priority/High Risk
*30/*30					2.43e-06						CYP2C9 Intermediate Metabolizer	Abnormal/Priority/High Risk
*30/*31					5e-06						CYP2C9 Intermediate Metabolizer	Abnormal/Priority/High Risk
*30/*55					3.24e-05						CYP2C9 Intermediate Metabolizer	Abnormal/Priority/High Risk
*31/*31					2.57e-06						CYP2C9 Intermediate Metabolizer	Abnormal/Priority/High Risk
*31/*55					3.33e-05						CYP2C9 Intermediate Metabolizer	Abnormal/Priority/High Risk
*4/*12		0	0	0	0	0	0	2.35e-06		0	CYP2C9 Intermediate Metabolizer	Abnormal/Priority/High Risk
*4/*14		0	0	0	0	0	0	2.35e-06		0	CYP2C9 Intermediate Metabolizer	Abnormal/Priority/High Risk
*4/*4		0	0	0	0	0	0	1.38e-06		0	CYP2C9 Intermediate Metabolizer	Abnormal/Priority/High Risk
*4/*5		0	0	0	0	0	0	1.23e-06		0	CYP2C9 Intermediate Metabolizer	Abnormal/Priority/High Risk
*4/*8		0	0	0	0	0	0	1.51e-06		0	CYP2C9 Intermediate Metabolizer	Abnormal/Priority/High Risk
*5/*11		0.000322	8.36e-06	0	0	5.74e-07	5.06e-05	0		0.00053	CYP2C9 Intermediate Metabolizer	Abnormal/Priority/High Risk
*5/*12		0		0	0			1.05e-06		0	CYP2C9 Intermediate Metabolizer	Abnormal/Priority/High Risk
*5/*14				0	0			1.05e-06			CYP2C9 Intermediate Metabolizer	Abnormal/Priority/High Risk
*5/*5		0.000135	2.22e-06	0	0	3.04e-08	7.6e-05	2.73e-07		0.000107	CYP2C9 Intermediate Metabolizer	Abnormal/Priority/High Risk
*5/*8		0.00137	6.08e-05	0	0	6.3e-07	0.000129	6.71e-07		0.00157	CYP2C9 Intermediate Metabolizer	Abnormal/Priority/High Risk
*5/*9		0		0	0			0		0.00268	CYP2C9 Intermediate Metabolizer	Abnormal/Priority/High Risk
*55/*55					0.000108						CYP2C9 Intermediate Metabolizer	Abnormal/Priority/High Risk
*6/*9		0	0	0	0			0		0.00228	CYP2C9 Intermediate Metabolizer	Abnormal/Priority/High Risk
*8/*11		0.00164	0.000114	2.05e-06	2.19e-06	5.94e-06	4.28e-05	0		0.0039	CYP2C9 Intermediate Metabolizer	Abnormal/Priority/High Risk
*8/*12		0		0	3.12e-06			1.28e-06		0	CYP2C9 Intermediate Metabolizer	Abnormal/Priority/High Risk
*8/*14					2.51e-06			1.28e-06			CYP2C9 Intermediate Metabolizer	Abnormal/Priority/High Risk
*8/*16					1.4e-05						CYP2C9 Intermediate Metabolizer	Abnormal/Priority/High Risk
*8/*23					1.58e-06						CYP2C9 Intermediate Metabolizer	Abnormal/Priority/High Risk
*8/*26					1.49e-05						CYP2C9 Intermediate Metabolizer	Abnormal/Priority/High Risk
*8/*28					1.49e-05						CYP2C9 Intermediate Metabolizer	Abnormal/Priority/High Risk
*8/*29					1.65e-05						CYP2C9 Intermediate Metabolizer	Abnormal/Priority/High Risk
*8/*30					1.16e-05						CYP2C9 Intermediate Metabolizer	Abnormal/Priority/High Risk
*8/*31					1.2e-05						CYP2C9 Intermediate Metabolizer	Abnormal/Priority/High Risk
*8/*55					7.76e-05						CYP2C9 Intermediate Metabolizer	Abnormal/Priority/High Risk
*8/*8		0.00349	0.000415	9.64e-07	1.39e-05	3.26e-06	5.43e-05	4.12e-07		0.00575	CYP2C9 Intermediate Metabolizer	Abnormal/Priority/High Risk
*8/*9		0		0	0			0		0.0197	CYP2C9 Intermediate Metabolizer	Abnormal/Priority/High Risk
*9/*11		0		0	0			0		0.00666	CYP2C9 Intermediate Metabolizer	Abnormal/Priority/High Risk
*11/*13		0			1.94e-06			0			CYP2C9 Poor Metabolizer	Abnormal/Priority/High Risk
*11/*25		0			1.17e-06			0			CYP2C9 Poor Metabolizer	Abnormal/Priority/High Risk
*11/*33					3.82e-07			0			CYP2C9 Poor Metabolizer	Abnormal/Priority/High Risk
*11/*42					5.86e-06			0			CYP2C9 Poor Metabolizer	Abnormal/Priority/High Risk
*12/*13		0		0	2.77e-06			0		0	CYP2C9 Poor Metabolizer	Abnormal/Priority/High Risk
*12/*25		0		0	1.67e-06					0	CYP2C9 Poor Metabolizer	Abnormal/Priority/High Risk
*12/*33		0		0	5.45e-07			2e-06		0	CYP2C9 Poor Metabolizer	Abnormal/Priority/High Risk
*12/*42		0		0	8.36e-06			2e-06		0	CYP2C9 Poor Metabolizer	Abnormal/Priority/High Risk
*13/*13		0			1.1e-05			0			CYP2C9 Poor Metabolizer	Abnormal/Priority/High Risk
*13/*14		0			2.23e-06			0			CYP2C9 Poor Metabolizer	Abnormal/Priority/High Risk
*13/*16		0			1.25e-05			0			CYP2C9 Poor Metabolizer	Abnormal/Priority/High Risk
*13/*23		0			1.41e-06			0			CYP2C9 Poor Metabolizer	Abnormal/Priority/High Risk
*13/*25		0			1.33e-05			0			CYP2C9 Poor Metabolizer	Abnormal/Priority/High Risk
*13/*26		0			1.33e-05			0			CYP2C9 Poor Metabolizer	Abnormal/Priority/High Risk
*13/*28		0			1.33e-05			0			CYP2C9 Poor Metabolizer	Abnormal/Priority/High Risk
*13/*29		0			1.46e-05			0			CYP2C9 Poor Metabolizer	Abnormal/Priority/High Risk
*13/*30		0			1.03e-05			0			CYP2C9 Poor Metabolizer	Abnormal/Priority/High Risk
*13/*31		0			1.06e-05			0			CYP2C9 Poor Metabolizer	Abnormal/Priority/High Risk
*13/*33		0			4.33e-06			0			CYP2C9 Poor Metabolizer	Abnormal/Priority/High Risk
*13/*42		0			6.63e-05			0			CYP2C9 Poor Metabolizer	Abnormal/Priority/High Risk
*13/*55		0			6.9e-05			0			CYP2C9 Poor Metabolizer	Abnormal/Priority/High Risk
*14/*25		0			1.34e-06						CYP2C9 Poor Metabolizer	Abnormal/Priority/High Risk
*14/*33					4.38e-07			2e-06			CYP2C9 Poor Metabolizer	Abnormal/Priority/High Risk
*14/*42					6.72e-06			2e-06			CYP2C9 Poor Metabolizer	Abnormal/Priority/High Risk
*16/*25		0			7.51e-06						CYP2C9 Poor Metabolizer	Abnormal/Priority/High Risk
*16/*33					2.45e-06						CYP2C9 Poor Metabolizer	Abnormal/Priority/High Risk
*16/*42					3.76e-05						CYP2C9 Poor Metabolizer	Abnormal/Priority/High Risk
*2/*13		0			1.41e-05			0			CYP2C9 Poor Metabolizer	Abnormal/Priority/High Risk
*2/*25		0			8.5e-06						CYP2C9 Poor Metabolizer	Abnormal/Priority/High Risk
*2/*3	0.03	0.000606	0.00201	0.025	0.00016	0.0192	0.00612	0.0214	0.000913	0.000293	CYP2C9 Poor Metabolizer	Abnormal/Priority/High Risk
*2/*33					2.77e-06			0.00026			CYP2C9 Poor Metabolizer	Abnormal/Priority/High Risk
*2/*42					4.25e-05			0.00026			CYP2C9 Poor Metabolizer	Abnormal/Priority/High Risk
*2/*6		0.000382	0	0	0	7.14e-05	0.000149	0		0.000231	CYP2C9 Poor Metabolizer	Abnormal/Priority/High Risk
*23/*25		0			8.48e-07						CYP2C9 Poor Metabolizer	Abnormal/Priority/High Risk
*23/*33					2.76e-07						CYP2C9 Poor Metabolizer	Abnormal/Priority/High Risk
*23/*42					4.24e-06						CYP2C9 Poor Metabolizer	Abnormal/Priority/High Risk
*25/*25		0			4e-06						CYP2C9 Poor Metabolizer	Abnormal/Priority/High Risk
*25/*26		0			8e-06						CYP2C9 Poor Metabolizer	Abnormal/Priority/High Risk
*25/*28		0			8e-06						CYP2C9 Poor Metabolizer	Abnormal/Priority/High Risk
*25/*29		0			8.83e-06						CYP2C9 Poor Metabolizer	Abnormal/Priority/High Risk
*25/*30		0			6.24e-06						CYP2C9 Poor Metabolizer	Abnormal/Priority/High Risk
*25/*31		0			6.41e-06						CYP2C9 Poor Metabolizer	Abnormal/Priority/High Risk
*25/*33		0			2.61e-06						CYP2C9 Poor Metabolizer	Abnormal/Priority/High Risk
*25/*42		0			4e-05						CYP2C9 Poor Metabolizer	Abnormal/Priority/High Risk
*25/*55		0			4.16e-05						CYP2C9 Poor Metabolizer	Abnormal/Priority/High Risk
*26/*33					2.61e-06						CYP2C9 Poor Metabolizer	Abnormal/Priority/High Risk
*26/*42					4e-05						CYP2C9 Poor Metabolizer	Abnormal/Priority/High Risk
*28/*33					2.61e-06						CYP2C9 Poor Metabolizer	Abnormal/Priority/High Risk
*28/*42					4e-05						CYP2C9 Poor Metabolizer	Abnormal/Priority/High Risk
*29/*33					2.88e-06						CYP2C9 Poor Metabolizer	Abnormal/Priority/High Risk
*29/*42					4.42e-05						CYP2C9 Poor Metabolizer	Abnormal/Priority/High Risk
*3/*11		0.000374	0.000169	0.000229	2.21e-05	0.000248	0.000233	0		0.000573	CYP2C9 Poor Metabolizer	Abnormal/Priority/High Risk
*3/*12		0		0	3.15e-05			0.000165		0	CYP2C9 Poor Metabolizer	Abnormal/Priority/High Risk
*3/*13		0			0.00025			0			CYP2C9 Poor Metabolizer	Abnormal/Priority/High Risk
*3/*14					2.53e-05			0.000165			CYP2C9 Poor Metabolizer	Abnormal/Priority/High Risk
*3/*16					0.000141						CYP2C9 Poor Metabolizer	Abnormal/Priority/High Risk
*3/*23					1.59e-05						CYP2C9 Poor Metabolizer	Abnormal/Priority/High Risk
*3/*25		0			0.00015						CYP2C9 Poor Metabolizer	Abnormal/Priority/High Risk
*3/*26					0.00015						CYP2C9 Poor Metabolizer	Abnormal/Priority/High Risk
*3/*28					0.00015						CYP2C9 Poor Metabolizer	Abnormal/Priority/High Risk
*3/*29					0.000166						CYP2C9 Poor Metabolizer	Abnormal/Priority/High Risk
*3/*3	0	0.000182	0.000903	0.0121	0.00142	0.00571	0.00161	0.00681	0.000243	0.000124	CYP2C9 Poor Metabolizer	Abnormal/Priority/High Risk
*3/*30					0.000117						CYP2C9 Poor Metabolizer	Abnormal/Priority/High Risk
*3/*31					0.000121						CYP2C9 Poor Metabolizer	Abnormal/Priority/High Risk
*3/*33					4.91e-05			0.000165			CYP2C9 Poor Metabolizer	Abnormal/Priority/High Risk
*3/*4		0	0	0	0	0	0	0.000194		0	CYP2C9 Poor Metabolizer	Abnormal/Priority/High Risk
*3/*42					0.000752			0.000165			CYP2C9 Poor Metabolizer	Abnormal/Priority/High Risk
*3/*5		0.000314	8.96e-05	0	0	2.64e-05	0.0007	8.63e-05		0.00023	CYP2C9 Poor Metabolizer	Abnormal/Priority/High Risk
*3/*55					0.000782						CYP2C9 Poor Metabolizer	Abnormal/Priority/High Risk
*3/*6		0.00023	0	0	0	4.23e-05	7.83e-05	0		0.000196	CYP2C9 Poor Metabolizer	Abnormal/Priority/High Risk
*3/*8		0.00159	0.00123	0.000216	0.000281	0.000273	0.000592	0.000106		0.00169	CYP2C9 Poor Metabolizer	Abnormal/Priority/High Risk
*30/*33					2.03e-06						CYP2C9 Poor Metabolizer	Abnormal/Priority/High Risk
*30/*42					3.12e-05						CYP2C9 Poor Metabolizer	Abnormal/Priority/High Risk
*31/*33					2.09e-06						CYP2C9 Poor Metabolizer	Abnormal/Priority/High Risk
*31/*42					3.21e-05						CYP2C9 Poor Metabolizer	Abnormal/Priority/High Risk
*33/*33					4.25e-07			1e-06			CYP2C9 Poor Metabolizer	Abnormal/Priority/High Risk
*33/*42					1.3e-05			2e-06			CYP2C9 Poor Metabolizer	Abnormal/Priority/High Risk
*33/*55					1.36e-05						CYP2C9 Poor Metabolizer	Abnormal/Priority/High Risk
*4/*33		0	0	0	0	0	0	2.35e-06		0	CYP2C9 Poor Metabolizer	Abnormal/Priority/High Risk
*4/*42		0	0	0	0	0	0	2.35e-06		0	CYP2C9 Poor Metabolizer	Abnormal/Priority/High Risk
*42/*42					0.0001			1e-06			CYP2C9 Poor Metabolizer	Abnormal/Priority/High Risk
*42/*55					0.000208						CYP2C9 Poor Metabolizer	Abnormal/Priority/High Risk
*5/*33				0	0			1.05e-06			CYP2C9 Poor Metabolizer	Abnormal/Priority/High Risk
*5/*42				0	0			1.05e-06			CYP2C9 Poor Metabolizer	Abnormal/Priority/High Risk
*5/*6		0.000198	0	0	0	9.78e-08	1.7e-05	0		0.000182	CYP2C9 Poor Metabolizer	Abnormal/Priority/High Risk
*6/*11		0.000236	0	0	0	9.22e-07	5.66e-06	0		0.000452	CYP2C9 Poor Metabolizer	Abnormal/Priority/High Risk
*6/*6		7.26e-05	0	0	0	7.85e-08	9.51e-07	0		7.75e-05	CYP2C9 Poor Metabolizer	Abnormal/Priority/High Risk
*6/*8		0.00101	0	0	0	1.01e-06	1.44e-05	0		0.00134	CYP2C9 Poor Metabolizer	Abnormal/Priority/High Risk
*8/*13		0			2.47e-05			0			CYP2C9 Poor Metabolizer	Abnormal/Priority/High Risk
*8/*25		0			1.49e-05						CYP2C9 Poor Metabolizer	Abnormal/Priority/High Risk
*8/*33					4.87e-06			1.28e-06			CYP2C9 Poor Metabolizer	Abnormal/Priority/High Risk
*8/*42					7.46e-05			1.28e-06			CYP2C9 Poor Metabolizer	Abnormal/Priority/High Risk
Total of Abnormal/ Priority/High Risk EHR Priority Result	0.327	0.241441	0.168506	0.400049	0.14616	0.370902	0.254484	0.389641	0.087815	0.268923
*1/*19					0.000873						Indeterminate	none
*1/*27		0			0.00296						Indeterminate	none
*1/*34					0.000388						Indeterminate	none
*11/*19					2.8e-07			0			Indeterminate	none
*11/*27		0			9.49e-07			0			Indeterminate	none
*11/*34					1.24e-07			0			Indeterminate	none
*12/*19		0		0	3.99e-07					0	Indeterminate	none
*12/*27		0		0	1.35e-06					0	Indeterminate	none
*12/*34		0		0	1.77e-07					0	Indeterminate	none
*13/*19		0			3.16e-06			0			Indeterminate	none
*13/*27		0			1.07e-05			0			Indeterminate	none
*13/*34		0			1.41e-06			0			Indeterminate	none
*14/*19					3.2e-07						Indeterminate	none
*14/*27		0			1.09e-06						Indeterminate	none
*14/*34					1.42e-07						Indeterminate	none
*16/*19					1.79e-06						Indeterminate	none
*16/*27		0			6.07e-06						Indeterminate	none
*16/*34					7.96e-07						Indeterminate	none
*19/*19					2.27e-07						Indeterminate	none
*19/*23					2.02e-07						Indeterminate	none
*19/*25		0			1.91e-06						Indeterminate	none
*19/*26					1.91e-06						Indeterminate	none
*19/*27		0			1.54e-06						Indeterminate	none
*19/*28					1.91e-06						Indeterminate	none
*19/*29					2.11e-06						Indeterminate	none
*19/*30					1.49e-06						Indeterminate	none
*19/*31					1.53e-06						Indeterminate	none
*19/*33					6.22e-07						Indeterminate	none
*19/*34					2.02e-07						Indeterminate	none
*19/*42					9.54e-06						Indeterminate	none
*19/*55					9.92e-06						Indeterminate	none
*2/*19					2.03e-06						Indeterminate	none
*2/*27		0			6.88e-06						Indeterminate	none
*2/*34					9.01e-07						Indeterminate	none
*23/*27		0			6.86e-07						Indeterminate	none
*23/*34					8.98e-08						Indeterminate	none
*25/*27		0			6.47e-06						Indeterminate	none
*25/*34		0			8.48e-07						Indeterminate	none
*26/*27		0			6.47e-06						Indeterminate	none
*26/*34					8.48e-07						Indeterminate	none
*27/*27		0			2.62e-06						Indeterminate	none
*27/*28		0			6.47e-06						Indeterminate	none
*27/*29		0			7.14e-06						Indeterminate	none
*27/*30		0			5.05e-06						Indeterminate	none
*27/*31		0			5.19e-06						Indeterminate	none
*27/*33		0			2.11e-06						Indeterminate	none
*27/*34		0			6.86e-07						Indeterminate	none
*27/*42		0			3.24e-05						Indeterminate	none
*27/*55		0			3.36e-05						Indeterminate	none
*28/*34					8.48e-07						Indeterminate	none
*29/*34					9.36e-07						Indeterminate	none
*3/*19					3.59e-05						Indeterminate	none
*3/*27		0			0.000122						Indeterminate	none
*3/*34					1.59e-05						Indeterminate	none
*30/*34					6.61e-07						Indeterminate	none
*31/*34					6.79e-07						Indeterminate	none
*33/*34					2.76e-07						Indeterminate	none
*34/*34					4.49e-08						Indeterminate	none
*34/*42					4.24e-06						Indeterminate	none
*34/*55					4.41e-06						Indeterminate	none
*8/*19					3.56e-06						Indeterminate	none
*8/*27		0			1.21e-05						Indeterminate	none
*8/*34					1.58e-06						Indeterminate	none
Total of None EHR Priority Result	0	0	0	0	0.004606	0	0	0	0	0
*9/*9		0		0	0			0		0.0168	CYP2C9 Normal Metabolizer	Normal/Routine/ Low Risk
Total of Normal EHR Priority Result		0		0	0			0		0.0168
aAverage frequencies based on the reported frequencies in one or multiple studies.
bBased on the PharmGKB biogeographical groups https://www.pharmgkb.org/page/biogeographicalGroups
cSee allele definition table (https://www.pharmgkb.org/page/cyp2c9RefMaterials) for allele definitions
**Current study
Ammar Ali Almarzooq
Galore Consultancy
ammar@galoreconsultancy.com
