# Supplementary material for: Exploration of Interethnic Variation in the Ibuprofen Metabolizing Enzyme&nbsp;CYP2C9: A Cautionary Guide for Treatment of COVID-19 Symptoms
Source: Research Square preprint supplement (doi:10.21203/rs.3.rs-156293/v1), 2021-02-08
Supplement: Supplementary file 9 [file eced76c19438a76468d60609.xlsx]

## Sheet: Additional File 4
Additional File 4. DMET Genotyping of CYP2C9 variants across 101 Jordanian individuals of Arab descent.
CHP Filename	Gene	Known Call	Relevant Alleles	Common Name	Probe Set ID	Basecall	Reference Base	Variant Base	Call	Haplotype Marker	Change for Variant	cDNA Change	Genome Position	RefSeqGene	Gender
DM-10-002_(DMET_Plus).dmet.chp	CYP2C9	*1/*1	All markers responsible for functional changes are Ref/Ref												Female
DM10-007_(DMET_Plus).dmet.chp	CYP2C9	*1/*1	All markers responsible for functional changes are Ref/Ref												Male
DM-10014R_(DMET_Plus).dmet.chp	CYP2C9	*1/*2		CYP2C9_55221C>T(A441A)	AM_10119	C/T	C	T	Ref/Var	N	A441A	1348C>T	Ch10:96738625	g.55221C>T; p.(Ala441=)	Female
DM-10014R_(DMET_Plus).dmet.chp	CYP2C9	*1/*2	*2	CYP2C9*2_3608C>T(R144C)	AM_10100	C/T	C	T	Ref/Var	Y	R144C	430C>T	Ch10:96692037	g.8633C>T; p.(Arg144Cys)	Female
DM-10-015_(DMET_Plus).dmet.chp	CYP2C9	*1/*2	*2	CYP2C9*2_3608C>T(R144C)	AM_10100	C/T	C	T	Ref/Var	Y	R144C	430C>T	Ch10:96692037	g.8633C>T; p.(Arg144Cys)	Female
DM-10-016r_(DMET_Plus).dmet.chp	CYP2C9	*1/*1	All markers responsible for functional changes are Ref/Ref												Female
DM-10017R_(DMET_Plus).dmet.chp	CYP2C9	*1/*2	*2	CYP2C9*2_3608C>T(R144C)	AM_10100	C/T	C	T	Ref/Var	Y	R144C	430C>T	Ch10:96692037	g.8633C>T; p.(Arg144Cys)	Female
DM-10019R_(DMET_Plus).dmet.chp	CYP2C9	*1/*1	All markers responsible for functional changes are Ref/Ref												Male
DM-10-020_(DMET_Plus).dmet.chp	CYP2C9	*1/*2		CYP2C9_55221C>T(A441A)	AM_10119	C/T	C	T	Ref/Var	N	A441A	1348C>T	Ch10:96738625	g.55221C>T; p.(Ala441=)	Male
DM-10-020_(DMET_Plus).dmet.chp	CYP2C9	*1/*2	*2	CYP2C9*2_3608C>T(R144C)	AM_10100	C/T	C	T	Ref/Var	Y	R144C	430C>T	Ch10:96692037	g.8633C>T; p.(Arg144Cys)	Male
DM-10-021_(DMET_Plus).dmet.chp	CYP2C9	*1/*3	*3	CYP2C9*3_42614A>C(I359L)	AM_10113	A/C	A	C	Ref/Var	Y	I359L	1075A>C	Ch10:96731043	g.47639A>C; p.(Ile359Leu)	Male
DM-10022R_(DMET_Plus).dmet.chp	CYP2C9	*1/*1	All markers responsible for functional changes are Ref/Ref												Female
DM-10-023_(DMET_Plus).dmet.chp	CYP2C9	*1/*1	All markers responsible for functional changes are Ref/Ref												Female
DM-10-024_(DMET_Plus).dmet.chp	CYP2C9	*1/*1	All markers responsible for functional changes are Ref/Ref												Female
DM-10-025_(DMET_Plus).dmet.chp	CYP2C9	*1/*3	*3	CYP2C9*3_42614A>C(I359L)	AM_10113	A/C	A	C	Ref/Var	Y	I359L	1075A>C	Ch10:96731043	g.47639A>C; p.(Ile359Leu)	Female
DM-10-026_(DMET_Plus).dmet.chp	CYP2C9	*1/*2		CYP2C9_55323A>T(G475G)	AM_10120	A/T	A	T	Ref/Var	N	G475G	1450A>T	Ch10:96738727	g.55323A>T; p.(Gly475=)	Male
DM-10-026_(DMET_Plus).dmet.chp	CYP2C9	*1/*2	*2	CYP2C9*2_3608C>T(R144C)	AM_10100	C/T	C	T	Ref/Var	Y	R144C	430C>T	Ch10:96692037	g.8633C>T; p.(Arg144Cys)	Male
DM-10032_(DMET_Plus).dmet.chp	CYP2C9	*1/*2	*2	CYP2C9*2_3608C>T(R144C)	AM_10100	C/T	C	T	Ref/Var	Y	R144C	430C>T	Ch10:96692037	g.8633C>T; p.(Arg144Cys)	Male
DM-10-027_(DMET_Plus).dmet.chp	CYP2C9	*1/*1	All markers responsible for functional changes are Ref/Ref												Male
DM-10038_(DMET_Plus).dmet.chp	CYP2C9	*1/*1	All markers responsible for functional changes are Ref/Ref												Male
DM-10028R_(DMET_Plus).dmet.chp	CYP2C9	*1/*1	All markers responsible for functional changes are Ref/Ref												Male
DM-10029R_(DMET_Plus).dmet.chp	CYP2C9	*1/*1	All markers responsible for functional changes are Ref/Ref												Female
DM-10030R_(DMET_Plus).dmet.chp	CYP2C9	*1/*1	All markers responsible for functional changes are Ref/Ref												Male
DM-10031R_(DMET_Plus).dmet.chp	CYP2C9	*1/*1	All markers responsible for functional changes are Ref/Ref												Male
DM-10033_(DMET_Plus).dmet.chp	CYP2C9	*1/*1	All markers responsible for functional changes are Ref/Ref												Female
DM-10034_(DMET_Plus).dmet.chp	CYP2C9	*1/*1	All markers responsible for functional changes are Ref/Ref												Female
DM-10035_(DMET_Plus).dmet.chp	CYP2C9	*1/*1	All markers responsible for functional changes are Ref/Ref												Female
DM-10036_(DMET_Plus).dmet.chp	CYP2C9	*1/*3	*3	CYP2C9*3_42614A>C(I359L)	AM_10113	A/C	A	C	Ref/Var	Y	I359L	1075A>C	Ch10:96731043	g.47639A>C; p.(Ile359Leu)	Female
DM-10037_(DMET_Plus).dmet.chp	CYP2C9	*1/*1	All markers responsible for functional changes are Ref/Ref												Female
DM10-039_(DMET_Plus).dmet.chp	CYP2C9	*1/*3		CYP2C9_55221C>T(A441A)	AM_10119	C/T	C	T	Ref/Var	N	A441A	1348C>T	Ch10:96738625	g.55221C>T; p.(Ala441=)	Female
DM10-039_(DMET_Plus).dmet.chp	CYP2C9	*1/*3	*3	CYP2C9*3_42614A>C(I359L)	AM_10113	A/C	A	C	Ref/Var	Y	I359L	1075A>C	Ch10:96731043	g.47639A>C; p.(Ile359Leu)	Female
DM10-040N_(DMET_Plus).dmet.chp	CYP2C9	*1/*1	All markers responsible for functional changes are Ref/Ref												Female
DM10-042N_(DMET_Plus).dmet.chp	CYP2C9	*1/*1	All markers responsible for functional changes are Ref/Ref												Female
DM10-041N_(DMET_Plus).dmet.chp	CYP2C9	*1/*1	All markers responsible for functional changes are Ref/Ref												Female
DM10-044N_(DMET_Plus).dmet.chp	CYP2C9	*1/*1	All markers responsible for functional changes are Ref/Ref												Female
DM10-043N_(DMET_Plus).dmet.chp	CYP2C9	*1/*1	All markers responsible for functional changes are Ref/Ref												Female
DM10-045N_(DMET_Plus).dmet.chp	CYP2C9	*1/*1	All markers responsible for functional changes are Ref/Ref												Female
DM10-046N_(DMET_Plus).dmet.chp	CYP2C9	*1/*1	All markers responsible for functional changes are Ref/Ref												Female
DM10-047N_(DMET_Plus).dmet.chp	CYP2C9	*1/*1	All markers responsible for functional changes are Ref/Ref												Female
DM10-051_(DMET_Plus).dmet.chp	CYP2C9	*1/*1	All markers responsible for functional changes are Ref/Ref												Female
DM10-052_(DMET_Plus).dmet.chp	CYP2C9	*1/*1	All markers responsible for functional changes are Ref/Ref												Male
DM10-053_(DMET_Plus).dmet.chp	CYP2C9	*1/*1	All markers responsible for functional changes are Ref/Ref												Male
DM10-054_(DMET_Plus).dmet.chp	CYP2C9	*1/*1	All markers responsible for functional changes are Ref/Ref												Male
DM10-055_(DMET_Plus).dmet.chp	CYP2C9	*1/*2	*2	CYP2C9*2_3608C>T(R144C)	AM_10100	C/T	C	T	Ref/Var	Y	R144C	430C>T	Ch10:96692037	g.8633C>T; p.(Arg144Cys)	Male
DM10-056_(DMET_Plus).dmet.chp	CYP2C9	*1/*1	All markers responsible for functional changes are Ref/Ref												Male
DM10-057_(DMET_Plus).dmet.chp	CYP2C9	*1/*2	*2	CYP2C9*2_3608C>T(R144C)	AM_10100	C/T	C	T	Ref/Var	Y	R144C	430C>T	Ch10:96692037	g.8633C>T; p.(Arg144Cys)	Male
DM10-057_(DMET_Plus).dmet.chp	CYP2C9	*1/*2		CYP2C9_55323A>T(G475G)	AM_10120	A/T	A	T	Ref/Var	N	G475G	1450A>T	Ch10:96738727	g.55323A>T; p.(Gly475=)	Male
DM10-060_(DMET_Plus)_2.dmet.chp	CYP2C9	*1/*1	All markers responsible for functional changes are Ref/Ref												Male
DM10-C1N_(DMET_Plus).dmet.chp	CYP2C9	*1/*1	All markers responsible for functional changes are Ref/Ref												Male
DM11-007_(DMET_Plus).dmet.chp	CYP2C9	*1/*3	*3	CYP2C9*3_42614A>C(I359L)	AM_10113	A/C	A	C	Ref/Var	Y	I359L	1075A>C	Ch10:96731043	g.47639A>C; p.(Ile359Leu)	Male
DM11-013_(DMET_Plus).dmet.chp	CYP2C9	*1/*1	All markers responsible for functional changes are Ref/Ref												Female
DM11-014a_(DMET_Plus).dmet.chp	CYP2C9	*1/*2	*2	CYP2C9*2_3608C>T(R144C)	AM_10100	C/T	C	T	Ref/Var	Y	R144C	430C>T	Ch10:96692037	g.8633C>T; p.(Arg144Cys)	Female
DM11-015_(DMET_Plus).dmet.chp	CYP2C9	*1/*2	*2	CYP2C9*2_3608C>T(R144C)	AM_10100	C/T	C	T	Ref/Var	Y	R144C	430C>T	Ch10:96692037	g.8633C>T; p.(Arg144Cys)	Male
DM11-016_(DMET_Plus).dmet.chp	CYP2C9	*1/*1	All markers responsible for functional changes are Ref/Ref												Female
DM11-017_(DMET_Plus).dmet.chp	CYP2C9	*1/*1	All markers responsible for functional changes are Ref/Ref												Male
DM11-021_(DMET_Plus).dmet.chp	CYP2C9	*2/*3	*2	CYP2C9*2_3608C>T(R144C)	AM_10100	C/T	C	T	Ref/Var	Y	R144C	430C>T	Ch10:96692037	g.8633C>T; p.(Arg144Cys)	Male
DM11-021_(DMET_Plus).dmet.chp	CYP2C9	*2/*3		CYP2C9_55323A>T(G475G)	AM_10120	A/T	A	T	Ref/Var	N	G475G	1450A>T	Ch10:96738727	g.55323A>T; p.(Gly475=)	Male
DM11-021_(DMET_Plus).dmet.chp	CYP2C9	*2/*3	*3	CYP2C9*3_42614A>C(I359L)	AM_10113	A/C	A	C	Ref/Var	Y	I359L	1075A>C	Ch10:96731043	g.47639A>C; p.(Ile359Leu)	Male
DM11-022_(DMET_Plus).dmet.chp	CYP2C9	*1/*1	All markers responsible for functional changes are Ref/Ref												Male
DM11-023_(DMET_Plus).dmet.chp	CYP2C9	*1/*3	*3	CYP2C9*3_42614A>C(I359L)	AM_10113	A/C	A	C	Ref/Var	Y	I359L	1075A>C	Ch10:96731043	g.47639A>C; p.(Ile359Leu)	Male
DM11-023_(DMET_Plus).dmet.chp	CYP2C9	*1/*3		CYP2C9_55323A>T(G475G)	AM_10120	A/T	A	T	Ref/Var	N	G475G	1450A>T	Ch10:96738727	g.55323A>T; p.(Gly475=)	Male
Dm12-001_(DMET_Plus).dmet.chp	CYP2C9	*1/*3		CYP2C9_55221C>T(A441A)	AM_10119	C/T	C	T	Ref/Var	N	A441A	1348C>T	Ch10:96738625	g.55221C>T; p.(Ala441=)	Male
Dm12-001_(DMET_Plus).dmet.chp	CYP2C9	*1/*3	*3	CYP2C9*3_42614A>C(I359L)	AM_10113	A/C	A	C	Ref/Var	Y	I359L	1075A>C	Ch10:96731043	g.47639A>C; p.(Ile359Leu)	Male
DM12-003_(DMET_Plus).dmet.chp	CYP2C9	*1/*1	All markers responsible for functional changes are Ref/Ref												Female
DM12-005A_(DMET_Plus).dmet.chp	CYP2C9	*1/*1	All markers responsible for functional changes are Ref/Ref												Female
DM12-010_(DMET_Plus).dmet.chp	CYP2C9	*1/*1	All markers responsible for functional changes are Ref/Ref												Female
DM12-012_(DMET_Plus).dmet.chp	CYP2C9	*1/*1	All markers responsible for functional changes are Ref/Ref												Female
DM12-015A_(DMET_Plus).dmet.chp	CYP2C9	*2/*3		CYP2C9_55323A>T(G475G)	AM_10120	A/T	A	T	Ref/Var	N	G475G	1450A>T	Ch10:96738727	g.55323A>T; p.(Gly475=)	Female
DM12-015A_(DMET_Plus).dmet.chp	CYP2C9	*2/*3	*2	CYP2C9*2_3608C>T(R144C)	AM_10100	C/T	C	T	Ref/Var	Y	R144C	430C>T	Ch10:96692037	g.8633C>T; p.(Arg144Cys)	Female
DM12-015A_(DMET_Plus).dmet.chp	CYP2C9	*2/*3	*3	CYP2C9*3_42614A>C(I359L)	AM_10113	A/C	A	C	Ref/Var	Y	I359L	1075A>C	Ch10:96731043	g.47639A>C; p.(Ile359Leu)	Female
dm12-017_(DMET_Plus).dmet.chp	CYP2C9	*1/*1	All markers responsible for functional changes are Ref/Ref												Male
dm12-021_(DMET_Plus).dmet.chp	CYP2C9	*1/*1	All markers responsible for functional changes are Ref/Ref												Female
DM12-023_(DMET_Plus).dmet.chp	CYP2C9	*1/*3		CYP2C9_55221C>T(A441A)	AM_10119	C/T	C	T	Ref/Var	N	A441A	1348C>T	Ch10:96738625	g.55221C>T; p.(Ala441=)	Male
DM12-023_(DMET_Plus).dmet.chp	CYP2C9	*1/*3	*3	CYP2C9*3_42614A>C(I359L)	AM_10113	A/C	A	C	Ref/Var	Y	I359L	1075A>C	Ch10:96731043	g.47639A>C; p.(Ile359Leu)	Male
DM12-025_(DMET_Plus).dmet.chp	CYP2C9	*1/*1	All markers responsible for functional changes are Ref/Ref												Male
DM12-026_(DMET_Plus).dmet.chp	CYP2C9	*1/*1	All markers responsible for functional changes are Ref/Ref												Male
DM12-028_(DMET_Plus).dmet.chp	CYP2C9	*1/*3		CYP2C9_55323A>T(G475G)	AM_10120	A/T	A	T	Ref/Var	N	G475G	1450A>T	Ch10:96738727	g.55323A>T; p.(Gly475=)	Male
DM12-028_(DMET_Plus).dmet.chp	CYP2C9	*1/*3	*3	CYP2C9*3_42614A>C(I359L)	AM_10113	A/C	A	C	Ref/Var	Y	I359L	1075A>C	Ch10:96731043	g.47639A>C; p.(Ile359Leu)	Male
DM12-029_(DMET_Plus).dmet.chp	CYP2C9	*1/*2	*2	CYP2C9*2_3608C>T(R144C)	AM_10100	C/T	C	T	Ref/Var	Y	R144C	430C>T	Ch10:96692037	g.8633C>T; p.(Arg144Cys)	Male
DM12-029_(DMET_Plus).dmet.chp	CYP2C9	*1/*2		CYP2C9_55323A>T(G475G)	AM_10120	A/T	A	T	Ref/Var	N	G475G	1450A>T	Ch10:96738727	g.55323A>T; p.(Gly475=)	Male
DM12-030A_(DMET_Plus).dmet.chp	CYP2C9	*1/*2	*2	CYP2C9*2_3608C>T(R144C)	AM_10100	C/T	C	T	Ref/Var	Y	R144C	430C>T	Ch10:96692037	g.8633C>T; p.(Arg144Cys)	Male
Dm12-032_(DMET_Plus).dmet.chp	CYP2C9	*1/*2	*2	CYP2C9*2_3608C>T(R144C)	AM_10100	C/T	C	T	Ref/Var	Y	R144C	430C>T	Ch10:96692037	g.8633C>T; p.(Arg144Cys)	Male
DM12-033_(DMET_Plus).dmet.chp	CYP2C9	*1/*1	All markers responsible for functional changes are Ref/Ref												Male
DM12-035_(DMET_Plus).dmet.chp	CYP2C9	*1/*1	All markers responsible for functional changes are Ref/Ref												Female
dm12-036_(DMET_Plus).dmet.chp	CYP2C9	*1/*1	All markers responsible for functional changes are Ref/Ref												Male
dm12-036_(DMET_Plus).dmet.chp	CYP2C9	*1/*1		CYP2C9_55323A>T(G475G)	AM_10120	A/T	A	T	Ref/Var	N	G475G	1450A>T	Ch10:96738727	g.55323A>T; p.(Gly475=)	Male
DM12-038_(DMET_Plus).dmet.chp	CYP2C9	*1/*3	*3	CYP2C9*3_42614A>C(I359L)	AM_10113	A/C	A	C	Ref/Var	Y	I359L	1075A>C	Ch10:96731043	g.47639A>C; p.(Ile359Leu)	Male
dm12-041_(DMET_Plus).dmet.chp	CYP2C9	*1/*1	All markers responsible for functional changes are Ref/Ref												Female
DM12-042_(DMET_Plus).dmet.chp	CYP2C9	*1/*1	All markers responsible for functional changes are Ref/Ref												Female
DM12-043A_(DMET_Plus).dmet.chp	CYP2C9	*1/*3	*3	CYP2C9*3_42614A>C(I359L)	AM_10113	A/C	A	C	Ref/Var	Y	I359L	1075A>C	Ch10:96731043	g.47639A>C; p.(Ile359Leu)	Female
DM12-049_(DMET_Plus).dmet.chp	CYP2C9	*1/*1	All markers responsible for functional changes are Ref/Ref												Female
Dm12-08_(DMET_Plus).dmet.chp	CYP2C9	*1/*2	*2	CYP2C9*2_3608C>T(R144C)	AM_10100	C/T	C	T	Ref/Var	Y	R144C	430C>T	Ch10:96692037	g.8633C>T; p.(Arg144Cys)	Male
Dm12-08_(DMET_Plus).dmet.chp	CYP2C9	*1/*2		CYP2C9_55221C>T(A441A)	AM_10119	C/T	C	T	Ref/Var	N	A441A	1348C>T	Ch10:96738625	g.55221C>T; p.(Ala441=)	Male
Dm12-24_(DMET_Plus).dmet.chp	CYP2C9	*2/*3	*2	CYP2C9*2_3608C>T(R144C)	AM_10100	C/T	C	T	Ref/Var	Y	R144C	430C>T	Ch10:96692037	g.8633C>T; p.(Arg144Cys)	Female
Dm12-24_(DMET_Plus).dmet.chp	CYP2C9	*2/*3	*3	CYP2C9*3_42614A>C(I359L)	AM_10113	A/C	A	C	Ref/Var	Y	I359L	1075A>C	Ch10:96731043	g.47639A>C; p.(Ile359Leu)	Female
Dm12-24_(DMET_Plus).dmet.chp	CYP2C9	*2/*3		CYP2C9_55221C>T(A441A)	AM_10119	C/T	C	T	Ref/Var	N	A441A	1348C>T	Ch10:96738625	g.55221C>T; p.(Ala441=)	Female
Dm12-47_(DMET_Plus).dmet.chp	CYP2C9	*1/*2	*2	CYP2C9*2_3608C>T(R144C)	AM_10100	C/T	C	T	Ref/Var	Y	R144C	430C>T	Ch10:96692037	g.8633C>T; p.(Arg144Cys)	Female
dm13-001_(DMET_Plus).dmet.chp	CYP2C9	*1/*1	All markers responsible for functional changes are Ref/Ref												Male
dm13-002_(DMET_Plus).dmet.chp	CYP2C9	*1/*1	All markers responsible for functional changes are Ref/Ref												Female
dm13-003_(DMET_Plus).dmet.chp	CYP2C9	*1/*2	*2	CYP2C9*2_3608C>T(R144C)	AM_10100	C/T	C	T	Ref/Var	Y	R144C	430C>T	Ch10:96692037	g.8633C>T; p.(Arg144Cys)	Male
dm13-004_(DMET_Plus).dmet.chp	CYP2C9	*1/*1	All markers responsible for functional changes are Ref/Ref												Female
dm13-005_(DMET_Plus).dmet.chp	CYP2C9	*1/*3	*3	CYP2C9*3_42614A>C(I359L)	AM_10113	A/C	A	C	Ref/Var	Y	I359L	1075A>C	Ch10:96731043	g.47639A>C; p.(Ile359Leu)	Female
dm13-005_(DMET_Plus).dmet.chp	CYP2C9	*1/*3		CYP2C9_55221C>T(A441A)	AM_10119	C/T	C	T	Ref/Var	N	A441A	1348C>T	Ch10:96738625	g.55221C>T; p.(Ala441=)	Female
dm13-006_(DMET_Plus).dmet.chp	CYP2C9	*1/*3	*3	CYP2C9*3_42614A>C(I359L)	AM_10113	A/C	A	C	Ref/Var	Y	I359L	1075A>C	Ch10:96731043	g.47639A>C; p.(Ile359Leu)	Female
dm13-006_(DMET_Plus).dmet.chp	CYP2C9	*1/*3		CYP2C9_55323A>T(G475G)	AM_10120	A/T	A	T	Ref/Var	N	G475G	1450A>T	Ch10:96738727	g.55323A>T; p.(Gly475=)	Female
dm13-006_(DMET_Plus).dmet.chp	CYP2C9	*1/*3		CYP2C9_55221C>T(A441A)	AM_10119	C/T	C	T	Ref/Var	N	A441A	1348C>T	Ch10:96738625	g.55221C>T; p.(Ala441=)	Female
dm13-007_(DMET_Plus).dmet.chp	CYP2C9	*1/*3	*3	CYP2C9*3_42614A>C(I359L)	AM_10113	A/C	A	C	Ref/Var	Y	I359L	1075A>C	Ch10:96731043	g.47639A>C; p.(Ile359Leu)	Female
dm13-008_(DMET_Plus).dmet.chp	CYP2C9	*1/*1	All markers responsible for functional changes are Ref/Ref												Male
DM13-009_(DMET_Plus).dmet.chp	CYP2C9	*1/*1	All markers responsible for functional changes are Ref/Ref												Male
DM13-010_(DMET_Plus).dmet.chp	CYP2C9	*1/*1	All markers responsible for functional changes are Ref/Ref												Male
DM13-011_(DMET_Plus).dmet.chp	CYP2C9	*1/*1	All markers responsible for functional changes are Ref/Ref												Male
DM13-012_(DMET_Plus).dmet.chp	CYP2C9	*1/*1	All markers responsible for functional changes are Ref/Ref												Male
DM13-013_(DMET_Plus).dmet.chp	CYP2C9	*1/*1	All markers responsible for functional changes are Ref/Ref												Male
DM13-014_(DMET_Plus).dmet.chp	CYP2C9	*1/*1	All markers responsible for functional changes are Ref/Ref												Male
DM13-015_(DMET_Plus).dmet.chp	CYP2C9	*1/*1	All markers responsible for functional changes are Ref/Ref												Male
DM13-017_(DMET_Plus).dmet.chp	CYP2C9	*1/*1	All markers responsible for functional changes are Ref/Ref												Male
DM13-018_(DMET_Plus).dmet.chp	CYP2C9	*1/*1	All markers responsible for functional changes are Ref/Ref												Male
DM13-019_(DMET_Plus).dmet.chp	CYP2C9	*1/*1	All markers responsible for functional changes are Ref/Ref												Male
DM13-021_(DMET_Plus).dmet.chp	CYP2C9	*1/*1	All markers responsible for functional changes are Ref/Ref												Male
DMT10-003_(DMET_Plus).dmet.chp	CYP2C9	*1/*1	All markers responsible for functional changes are Ref/Ref												Male
Genomic DM-10-001_(DMET_Plus).dmet.chp	CYP2C9	*1/*1	All markers responsible for functional changes are Ref/Ref												Female
Ammar Ali Almarzooq
Galore Consultancy
ammar@galoreconsultancy.com
