# Supplementary material for: Exploration of Interethnic Variation in the Ibuprofen Metabolizing Enzyme&nbsp;CYP2C9: A Cautionary Guide for Treatment of COVID-19 Symptoms
Source: Research Square preprint supplement (doi:10.21203/rs.3.rs-156293/v1), 2021-02-08
Supplement: Supplementary file 10 [file f03ab4854221d8de8e4f2ec4.xlsx]

## Sheet: Additional File 9
Additional File 9. Frequencies(a) of CYP2C9 alleles in biogeographical groups(b) and Jordanian
CYP2C9 allelec	*2	*3	*5	*6	*8	*9	*11	*42	*55	Others:	*4	*12	*13	*14	*16	*19	*23	*25	*26	*27	*28	*29	*30	*31	*33	*34
Sub-Saharan African	0.0131146	0.0111555	0.0103258	0.00880176	0.0758469	0.129559	0.0256856			0	0	0
Central/South Asian	0.113797	0.10986	0	0	0.000981595	0	0.00104294			0	0	0
Near Eastern	0.129773	0.0825147	0.000522667	0	0.000642132	0	0	0.001		0.00417547	0.00117547	0.001	0	0.001											0.001
European	0.127301	0.0755448	0.000174483	0.000280256	0.00180533		0.00164439			0	0
Jordanian**	0.0941	0.0842	0	0		0	0			0	0	0	0	0	0			0
Latino	0.0762566	0.0401567	0.00871987	0.000975047	0.00737064		0.00290185			0	0
African American/ Afro-Caribbean	0.0224372	0.0135059	0.0116269	0.00852138	0.0590347	0	0.013861			0	0	0	0					0		0
American	0.0334024	0.0300545	0.00149131	0	0.0203829		0.00280407			0	0
East Asian	0.00212568	0.0376167	0	0	0.00373066	0	0.000293165	0.01	0.0104	0.0204901	0	0.00041809	0.0033167	0.000335882	0.00187762	0.000476869	0.000211942	0.002	0.002	0.00161769	0.002	0.00220817	0.00155988	0.00160301	0.000652272	0.000211942
Oceanian	0.029311	0.015576								0
aAverage frequencies based on the reported frequencies in one or multiple studies.
bBased on the PharmGKB biogeographical groups https://www.pharmgkb.org/page/biogeographicalGroups
cSee allele definition table (https://www.pharmgkb.org/page/cyp2c9RefMaterials) for allele definitions
**Current study
Ammar Ali Almarzooq
Galore Consultancy
ammar@galoreconsultancy.com
